# Supplementary material for: TXNIP DNA methylation is associated with glycemic control over 28 years in type 1 diabetes: findings from the Pittsburgh Epidemiology of Diabetes Complications (EDC) study
Source: PubMed Central journal article supplement — BMJ Open Diabetes Res Care. 2023 Jan 5;11(1):e003068. doi: 10.1136/bmjdrc-2022-003068 (PMC9827189; doi:10.1136/bmjdrc-2022-003068), 2023-01-05
Supplement: bmjdrc-2022-003068supp001.pdf [file bmjdrc-2022-003068supp001.pdf]

**Supplemental Material:****TXNIP DNA methylation is Associated with Glycemic Control Over 28 Years in Type 1 Diabetes: Findings from the Pittsburgh Epidemiology of Diabetes Complications (EDC) Study**

Rachel G. Miller<sup>1</sup>, Josyf C. Mychaleckyj<sup>2</sup>, Suna Onengut-Gumuscu<sup>2</sup>, Trevor J. Orchard<sup>1</sup>, Tina Costacou<sup>1</sup>

<sup>1</sup>Department of Epidemiology, University of Pittsburgh, Pittsburgh, PA

<sup>2</sup>Center for Public Health Genomics, University of Virginia, Charlottesville, VA

### Detailed DNA Methylation Quality Control and Data Processing Information

The EPIC output Intensity Data (IDAT) file contained raw probe intensity data, as well as the control probe information needed for quality control. The IDAT files were loaded and converted into an RGSet object and thence to a GMSet object based on the Illumina 1.0 B5 hg38 annotation release, using minfi. The minfiQC function was used to check for outlier samples of potentially poorer quality based on: 1) median intensity of methylated (M) versus unmethylated (U) probes; 2) median X, Y chromosome probe signals for karyotype prediction; 3) sample probe detection rate at  $p$ -value  $< 0.01$ ; 4) repeated sample probe detection rate after dropping low quality probes (probe detection rate  $< 95\%$ ) and a curated list of probes recommended for exclusion by Zhou et al. (1). A second pipeline of quality control checks used functions in the SeSAMe package, after conversion of the RGset object to SigSet objects, to confirm and expand the minfi sample methylation data checks. The second pipeline checked: 1) mean sample probe intensity distribution by sample,  $\text{mean}(M+U)$ ; 2) sample bisulfite GCT score for completeness of bisulfite conversion; 3) inferred sex karyotype based on chromosome X and Y probes; 4) detection of duplicate samples using SNP genotype data extracted from a subset of the probes. Probe quality checks were also performed based on individual probe detection  $p$ -values. Any probe that was not detected in at least 95% of samples was dropped along with an exclusion set of probes previously identified to have a higher probability of generating artifactual methylation signals due to underlying genome sequence composition issues, cross-reactivity, or the likely presence of flanking SNP variation in predominantly European ancestry populations (1). Cryptic sample duplicates were inferred using KING (2) applied to the SNP genotype data extracted from the Illumina 'spiked-in' SNP probes ( $n=44$ ) and additional probes that manifest a reproducible pattern of genotype-stratified methylation signals driven by a flanking SNP ( $n=865$  SNPs in total).

#### References:

1. Zhou W, Laird PW, Shen H. Comprehensive characterization, annotation and innovative use of Infinium DNA methylation BeadChip probes. *Nucleic Acids Res.* 2017 Feb 28;45(4):e22.
2. Manichaikul A, Mychaleckyj JC, Rich SS, Daly K, Sale M, Chen W. Robust relationship inference in genome-wide association studies. *Bioinformatics.* 2010;26(22):2867–73.

### **Ascertainment of Clinical Variables**

Data on clinical variables were taken from the study visit of DNA collection. Fasting blood samples were obtained to measure HbA1c, lipids, and serum creatinine. HbA1c values were converted to DCCT-aligned values using a regression equation derived from duplicate assays ( $DCCT\ HbA1c = 0.14 + 0.83[EDC\ HbA1c]$ ) (1). Total cholesterol and triglycerides were determined enzymatically (2,3). HDL cholesterol was determined using a modified precipitation technique (4). Non-HDL cholesterol was calculated by subtracting HDL cholesterol from total cholesterol. Blood pressure was measured according to the Hypertension Detection and Follow-Up protocol with a random-zero sphygmomanometer (5). Pulse rate (beats/minute) was determined by palpating the radial pulse for 30 seconds and multiplying by two. Urinary albumin was measured by immunonephelometry (6). Albumin excretion rate (AER) was calculated for each of three timed urine samples (24-hour, overnight, and 4-hour collections obtained over a two-week period); the median of the three AERs was used in analyses. Serum creatinine was measured using an Ectachem 400 Analyzer (Eastman Kodak Co.) and glomerular filtration rate was estimated by the CKD-EPI creatinine equation (7). Height and weight were measured using standard methods to calculate BMI. Smoking history, insulin regimen, lipid-lowering and blood pressure-lowering medication use, history of hypoglycemia requiring assistance, and history of diabetic ketoacidosis were self-reported via questionnaire. Insulin dose was calculated as insulin units per day divided by body weight (kg).

### **References:**

1. Prince CT, Becker DJ, Costacou T, Miller RG, Orchard TJ. Changes in glycaemic control and risk of coronary artery disease in type 1 diabetes mellitus: findings from the Pittsburgh Epidemiology of Diabetes Complications Study (EDC). *Diabetologia*. 2007 Nov;50(11):2280–8.
2. Bucolo G, David H. Quantitative determination of serum triglycerides by the use of enzymes. *Clin Chem*. 1973;19(5):476–82.
3. Allain CC, Poon LS, Chan CSG, Richmond W, Fu PC. Enzymatic determination of total serum cholesterol. *Lipids*. 1974;20(4):470–5.
4. Warnick GR, Albers JJ. Heparin--Mn<sup>2+</sup> quantitation of high-density-lipoprotein cholesterol: an ultrafiltration procedure for lipemic samples. *Clin Chem*. 1978;24(6):900–4.
5. The hypertension detection and follow-up program. Hypertension detection and follow-up program cooperative group. *Prev Med*. 1976;5:207–15.

6. Ellis D, Coonrod BA, Dorman JS, Kelsey SF, Becker DJ, Avner ED, et al. Choice of urine sample predictive of microalbuminuria in patients with insulin-dependent diabetes mellitus. *Am J kidney Dis Off J Natl Kidney Found.* 1989;13(4):321–8.
7. Levey AS, Stevens LA, Schmid CH, Zhang YL, Castro AF, Feldman HI, et al. A new equation to estimate glomerular filtration rate. *Ann Intern Med.* 2009;150(9):604–12.

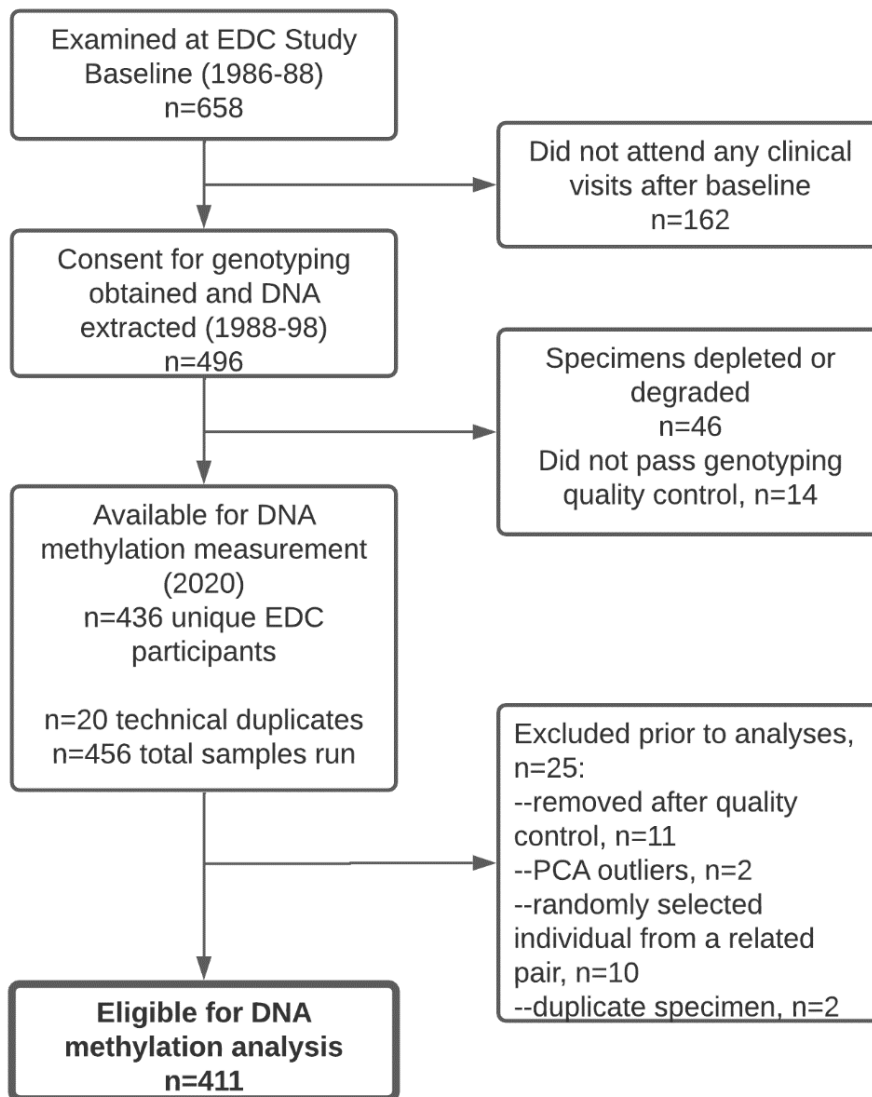

Online Supplemental Figure 1. Flow diagram of the analytic sample for epigenome-wide associations between DNA methylation and baseline HbA1c in the EDC study

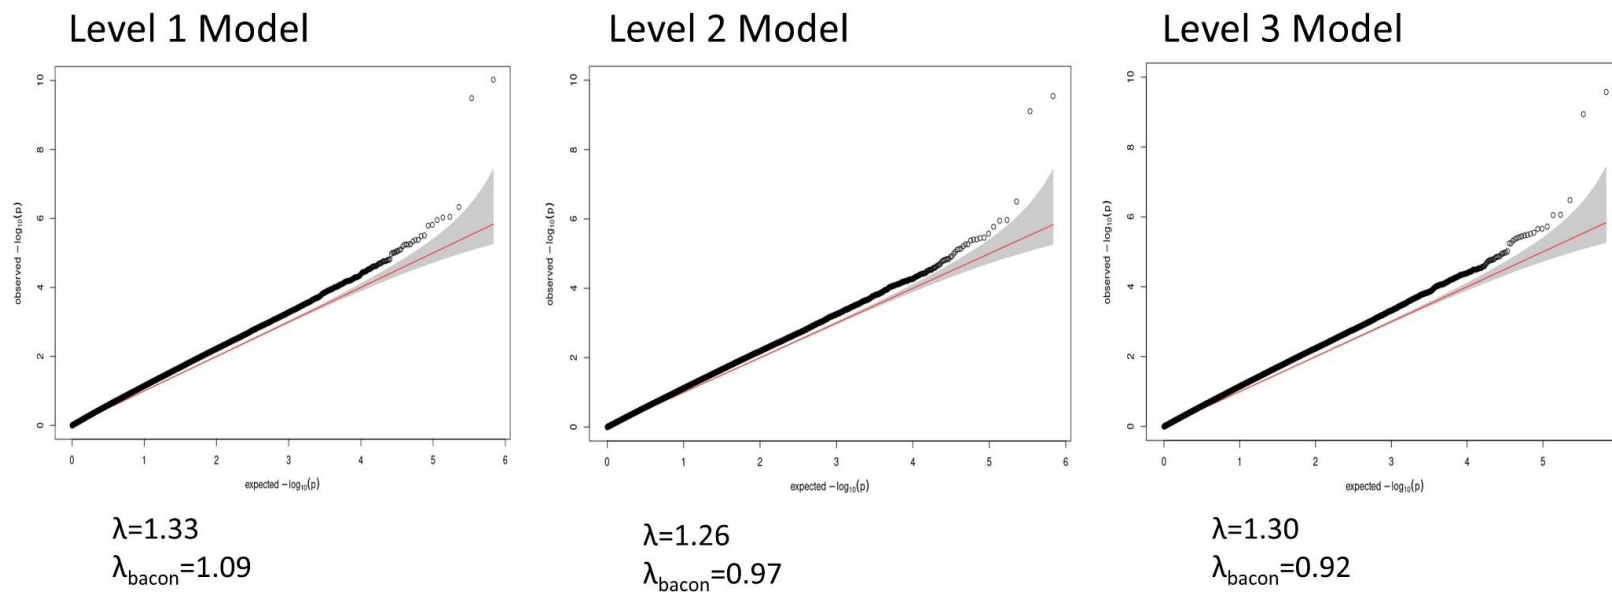

Online Supplemental Figure 2. QQ plots for epigenome-wide association of DNA methylation with baseline HbA1c in the EDC cohort by the three models

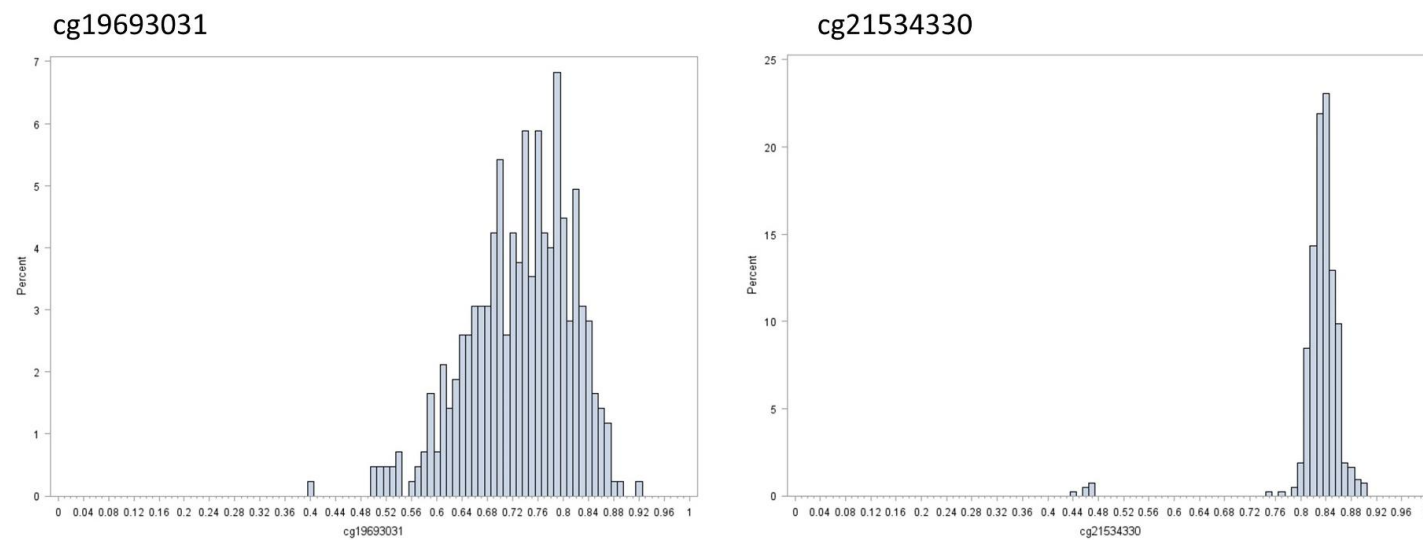

Online Supplemental Figure 3. Distribution of probe  $\beta$  values for CpGs significantly associated with HbA1c in the EDC study

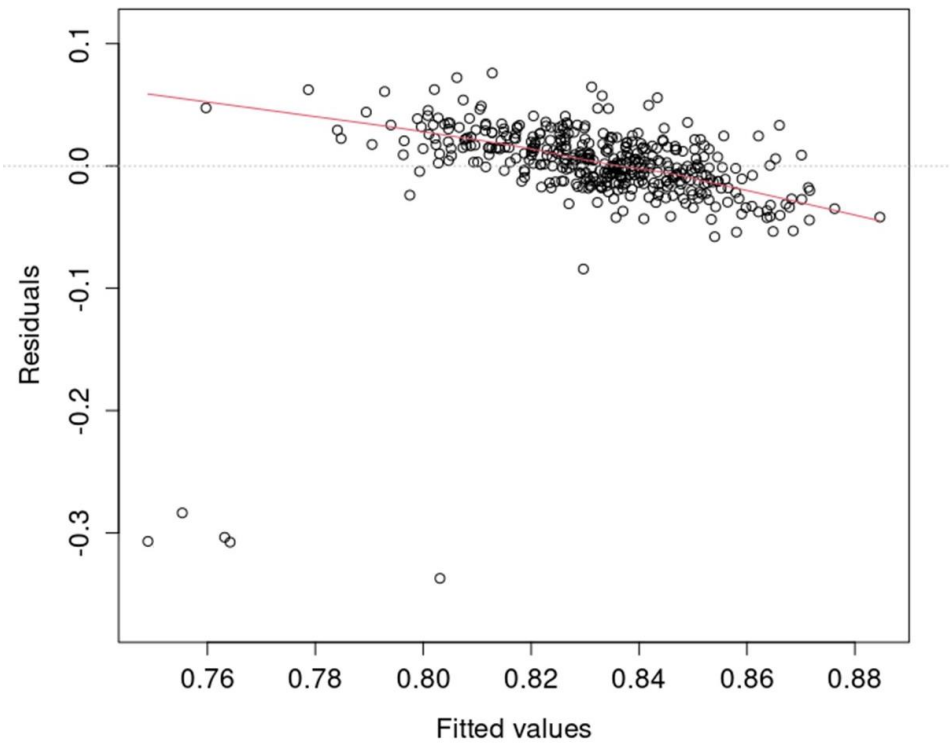

Online Supplemental Figure 4. Plot of residuals versus fitted values from the linear model for cg21534330 and HbA1c



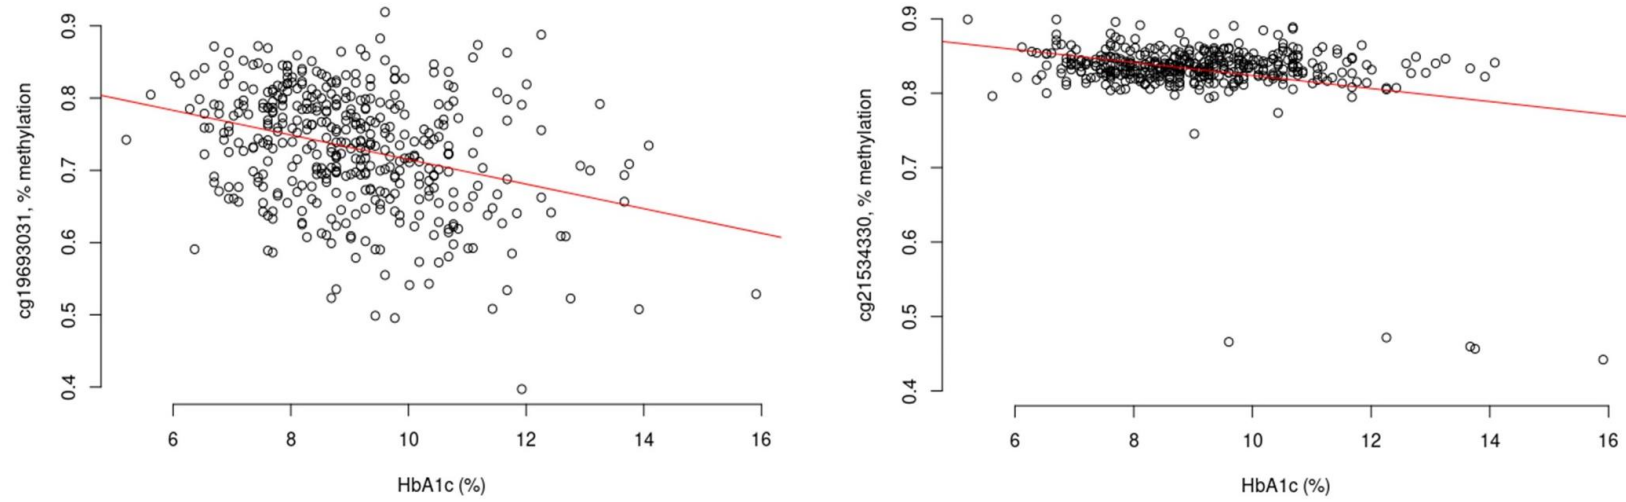

Online Supplemental Figure 5. Scatter plots of methylation by HbA1c for significant CpGs

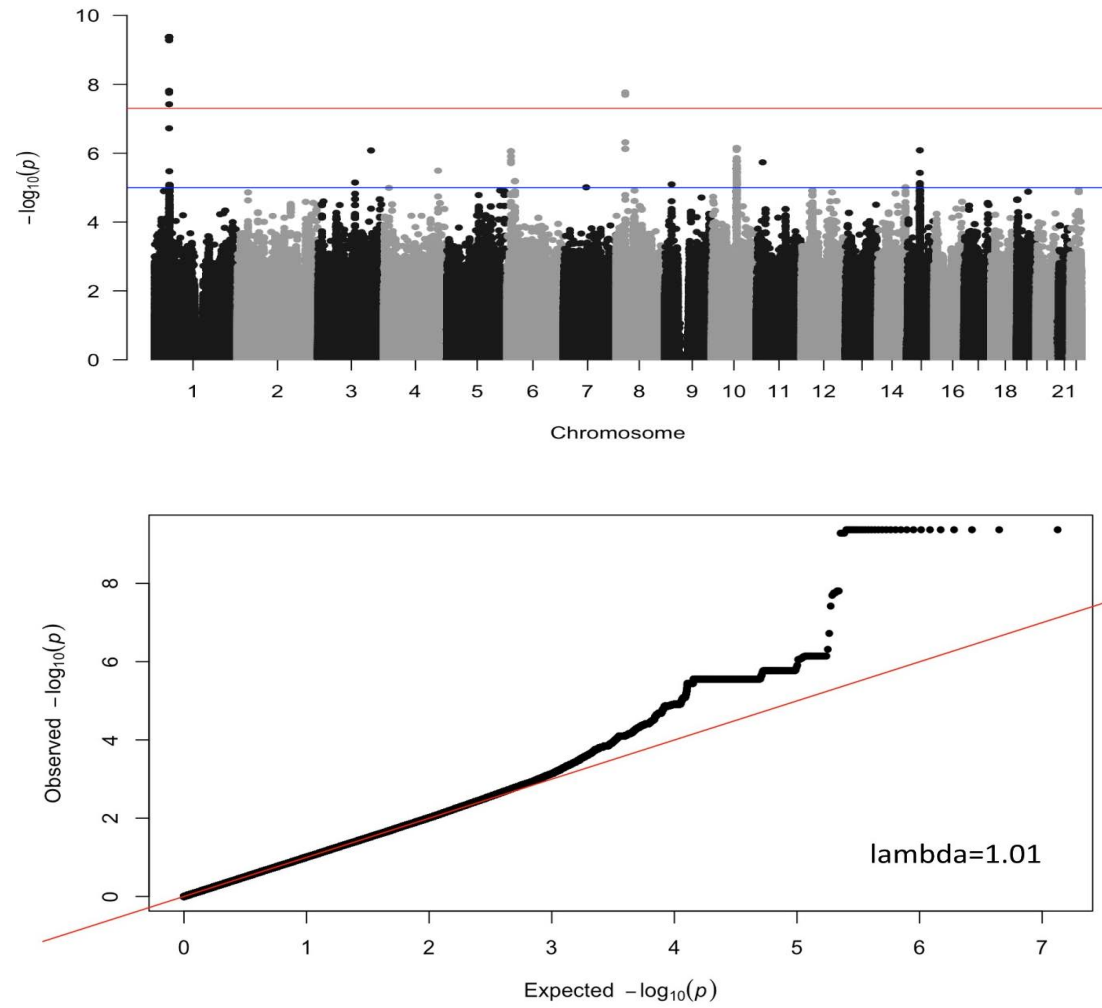

Online Supplemental Figure 6. Manhattan and QQ plots for SNP genome-wide associations with methylation at cg19693031 in the EDC cohort

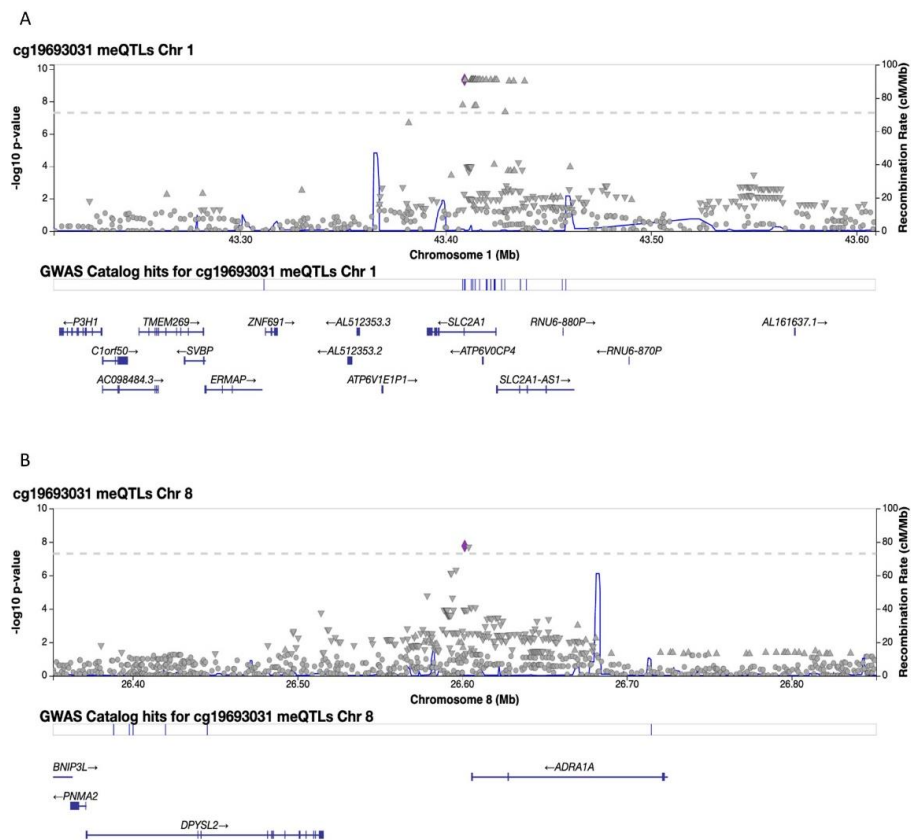

Online Supplemental Figure 7. Locus zoom plots for meQTLs associated with cg19693031 methylation in the EDC cohort.

Online Supplemental Table 1. Baseline characteristics of the EDC study DNA methylation sub-cohort (n=411)

|                                                                 | Mean (SD)          |
|-----------------------------------------------------------------|--------------------|
| Age, years                                                      | 29.7 (7.9)         |
| T1D Duration, years                                             | 21.4 (7.7)         |
| Age at T1D Onset, years                                         | 8.3 (4.1)          |
| Female Sex, % (n)                                               | 47.0% (193)        |
| ≥Bachelor's Degree, % (n)                                       | 34.3% (141)        |
| HbA1c, %                                                        | 9.1 (1.6)          |
| HbA1c, mmol/mol                                                 | 75.6 (17.0)        |
| Number of Longitudinal HbA1c Measures*                          | 5 (1-8)            |
| Smoking Status, % (n)                                           |                    |
| Never                                                           | 64.2% (263)        |
| Past                                                            | 14.8% (61)         |
| Current                                                         | 21.3% (87)         |
| Smoking, pack-years <sup>†</sup>                                | 0 (0, 3.3)         |
| Body Mass Index, kg/m <sup>2</sup>                              | 24.1 (3.3)         |
| Insulin Dose, insulin units/kg body weight                      | 0.78 (0.25)        |
| MDI <sup>‡</sup> or Insulin Pump Use, % (n)                     | 14.2% (58)         |
| Self-monitoring of blood glucose, % (n)                         | 72.3% (295)        |
| History of Hypoglycemia Requiring Assistance, % (n)             | 44.0% (180)        |
| Estimated Glucose Disposal Rate, mg/kg/min                      | 7.4 (2.1)          |
| Total Cholesterol (mg/dl)                                       | 188.8 (41.9)       |
| HDLc (mg/dl)                                                    | 53.2 (12.7)        |
| Non-HDLc (mg/dl)                                                | 135.6 (40.8)       |
| Triglycerides (mg/dl)‡                                          | 82.0 (57.0, 123.5) |
| Lipid Medication, % (n)                                         | 0.49% (2)          |
| Systolic Blood Pressure (mmHg)                                  | 115.3 (18.0)       |
| Diastolic Blood Pressure (mmHg)                                 | 72.9 (11.0)        |
| Hypertension, % (n)                                             | 21.4% (88)         |
| Blood Pressure Medication, % (n)                                | 13.6% (56)         |
| Pulse Rate, bpm                                                 | 75.9 (10.9)        |
| Albumin Excretion Rate, µg/min <sup>†</sup>                     | 12.2 (6.4, 105.7)  |
| Estimated Glomerular Filtration Rate, ml/min/1.73m <sup>2</sup> | 108.9 (35.1)       |
| White Blood Cell Count, x 10 <sup>9</sup> cells/l               | 7.0 (2.2)          |

\*median (range), <sup>†</sup>median (p25, p75), <sup>‡</sup>Multiple daily injection therapy (≥3 insulin injections per day)

Online Supplemental Table 2. Variants associated with cg19693031 methylation (meQTLs) at genome-wide significance in the EDC cohort

| CHR | Accession Num | Gene Symbol           | Variant Type                          | SNP        | BP       | A1    | BETA    | SE       | L95     | U95     | P        | meQTL in GoDMC <sup>a</sup> | eQTL in GTEx <sup>b</sup> |
|-----|---------------|-----------------------|---------------------------------------|------------|----------|-------|---------|----------|---------|---------|----------|-----------------------------|---------------------------|
| 1   | rs5773795     | SLC2A1                | Indel                                 | 1:43412360 | 43412360 | CCAAT | 0.04494 | 0.00703  | 0.03116 | 0.05872 | 4.58E-10 | yes                         | no                        |
| 1   | rs200895692   | SLC2A1                | Indel                                 | 1:43421956 | 43421956 | C     | 0.04494 | 0.00703  | 0.03116 | 0.05872 | 4.58E-10 | yes                         | yes                       |
| 1   | rs3216016     | SLC2A1                | Indel                                 | 1:43418056 | 43418056 | A     | 0.04494 | 0.00703  | 0.03116 | 0.05872 | 4.58E-10 | yes                         | yes                       |
| 1   | rs3841834     | SLC2A1                | Indel                                 | 1:43413384 | 43413384 | TA    | 0.04494 | 0.00703  | 0.03116 | 0.05872 | 4.58E-10 | yes                         | yes                       |
| 1   | rs893766801   | SLC2A1                | Intron SNV                            | 1:43414738 | 43414738 | C     | 0.03911 | 0.006799 | 0.02578 | 0.05243 | 1.76E-08 | yes                         | no                        |
| 1   | rs1108902     | SLC2A1                | Intron SNV                            | 1:43413212 | 43413212 | A     | 0.04494 | 0.00703  | 0.03116 | 0.05872 | 4.58E-10 | yes                         | yes                       |
| 1   | rs12718444    | SLC2A1                | Intron SNV                            | 1:43409179 | 43409179 | T     | 0.04494 | 0.00703  | 0.03116 | 0.05872 | 4.58E-10 | yes                         | yes                       |
| 1   | rs17387733    | SLC2A1                | Intron SNV                            | 1:43414285 | 43414285 | C     | 0.04494 | 0.00703  | 0.03116 | 0.05872 | 4.58E-10 | yes                         | yes                       |
| 1   | rs17387775    | SLC2A1                | Intron SNV                            | 1:43416133 | 43416133 | C     | 0.04494 | 0.00703  | 0.03116 | 0.05872 | 4.58E-10 | yes                         | yes                       |
| 1   | rs17387886    | SLC2A1                | Intron SNV                            | 1:43419705 | 43419705 | C     | 0.04494 | 0.00703  | 0.03116 | 0.05872 | 4.58E-10 | yes                         | yes                       |
| 1   | rs2297976     | SLC2A1                | Intron SNV                            | 1:43415465 | 43415465 | T     | 0.04494 | 0.00703  | 0.03116 | 0.05872 | 4.58E-10 | yes                         | yes                       |
| 1   | rs34964576    | SLC2A1                | Intron SNV                            | 1:43409364 | 43409364 | C     | 0.04494 | 0.00703  | 0.03116 | 0.05872 | 4.58E-10 | yes                         | yes                       |
| 1   | rs35022307    | SLC2A1                | Intron SNV                            | 1:43409420 | 43409420 | T     | 0.04494 | 0.00703  | 0.03116 | 0.05872 | 4.58E-10 | yes                         | yes                       |
| 1   | rs3768036     | SLC2A1                | Intron SNV                            | 1:43412655 | 43412655 | A     | 0.04494 | 0.00703  | 0.03116 | 0.05872 | 4.58E-10 | yes                         | yes                       |
| 1   | rs3768037     | SLC2A1                | Intron SNV                            | 1:43412662 | 43412662 | A     | 0.04494 | 0.00703  | 0.03116 | 0.05872 | 4.58E-10 | yes                         | yes                       |
| 1   | rs3768042     | SLC2A1                | Intron SNV                            | 1:43413735 | 43413735 | G     | 0.04494 | 0.00703  | 0.03116 | 0.05872 | 4.58E-10 | yes                         | yes                       |
| 1   | rs57247989    | SLC2A1                | Intron SNV                            | 1:43414370 | 43414370 | G     | 0.04494 | 0.00703  | 0.03116 | 0.05872 | 4.58E-10 | yes                         | yes                       |
| 1   | rs61296119    | SLC2A1                | Intron SNV                            | 1:43414046 | 43414046 | C     | 0.03882 | 0.006762 | 0.02556 | 0.05207 | 1.87E-08 | yes                         | yes                       |
| 1   | rs6657798     | SLC2A1                | Intron SNV                            | 1:43408279 | 43408279 | G     | 0.03935 | 0.006829 | 0.02597 | 0.05274 | 1.66E-08 | yes                         | yes                       |
| 1   | rs71654266    | SLC2A1                | Intron SNV                            | 1:43414656 | 43414656 | G     | 0.04494 | 0.00703  | 0.03116 | 0.05872 | 4.58E-10 | yes                         | yes                       |
| 1   | rs74742820    | SLC2A1                | Intron SNV                            | 1:43414369 | 43414369 | C     | 0.04494 | 0.00703  | 0.03116 | 0.05872 | 4.58E-10 | yes                         | yes                       |
| 1   | rs7512557     | SLC2A1                | Intron SNV                            | 1:43413324 | 43413324 | T     | 0.04494 | 0.00703  | 0.03116 | 0.05872 | 4.58E-10 | yes                         | yes                       |
| 1   | rs7512565     | SLC2A1                | Intron SNV                            | 1:43413361 | 43413361 | T     | 0.04494 | 0.00703  | 0.03116 | 0.05872 | 4.58E-10 | yes                         | yes                       |
| 1   | rs7522674     | SLC2A1                | Intron SNV                            | 1:43416781 | 43416781 | T     | 0.04494 | 0.00703  | 0.03116 | 0.05872 | 4.58E-10 | yes                         | yes                       |
| 1   | rs7534555     | SLC2A1                | Intron SNV                            | 1:43413319 | 43413319 | C     | 0.04494 | 0.00703  | 0.03116 | 0.05872 | 4.58E-10 | yes                         | yes                       |
| 1   | rs75366795    | SLC2A1                | Intron SNV                            | 1:43414447 | 43414447 | G     | 0.04494 | 0.00703  | 0.03116 | 0.05872 | 4.58E-10 | yes                         | yes                       |
| 1   | rs900835      | SLC2A1                | Intron SNV                            | 1:43412455 | 43412455 | T     | 0.04494 | 0.00703  | 0.03116 | 0.05872 | 4.58E-10 | yes                         | yes                       |
| 1   | rs114530232   | SLC2A1;<br>SLC2A1-AS1 | Intron SNV;<br>2KB<br>Upstream<br>SNV | 1:43424051 | 43424051 | G     | 0.04494 | 0.00703  | 0.03116 | 0.05872 | 4.58E-10 | yes                         | yes                       |
| 1   | rs3754226     | SLC2A1;<br>SLC2A1-    | Non-coding<br>transcript              | 1:43424812 | 43424812 | G     | 0.04494 | 0.00703  | 0.03116 | 0.05872 | 4.58E-10 | yes                         | yes                       |

|   |            |                           |                                       |            |          |   |          |          |          |          |          |     |     |
|---|------------|---------------------------|---------------------------------------|------------|----------|---|----------|----------|----------|----------|----------|-----|-----|
|   |            | AS1                       | SNV; 2KB<br>Upstream<br>SNV           |            |          |   |          |          |          |          |          |     |     |
| 1 | rs80200046 | SLC2A1;<br>SLC2A1-<br>AS1 | Intron SNV;<br>2KB<br>Upstream<br>SNV | 1:43423932 | 43423932 | A | 0.04494  | 0.00703  | 0.03116  | 0.05872  | 4.58E-10 | yes | yes |
| 1 | rs12750584 | SLC2A1-<br>AS1            | Intron SNV                            | 1:43430883 | 43430883 | A | 0.04477  | 0.007042 | 0.03097  | 0.05858  | 5.58E-10 | yes | yes |
| 1 | rs58062906 | SLC2A1-<br>AS1            | Intron SNV                            | 1:43438399 | 43438399 | T | 0.04477  | 0.007042 | 0.03097  | 0.05858  | 5.58E-10 | yes | yes |
| 1 | rs71654267 | SLC2A1-<br>AS1            | Intron SNV                            | 1:43433066 | 43433066 | A | 0.04477  | 0.007042 | 0.03097  | 0.05858  | 5.58E-10 | yes | yes |
| 1 | rs77841501 | SLC2A1-<br>AS1            | Intron SNV                            | 1:43428964 | 43428964 | G | 0.04981  | 0.008922 | 0.03232  | 0.0673   | 4.39E-08 | yes | yes |
| 8 | rs7843809  | ADRA1A                    | 3' UTR SNV                            | 8:26601545 | 26601545 | A | -0.03643 | 0.006331 | -0.04883 | -0.02402 | 1.74E-08 | no  | no  |
| 8 | rs9314327  | ADRA1A                    | 3' UTR SNV                            | 8:26603955 | 26603955 | C | -0.03626 | 0.006333 | -0.04868 | -0.02385 | 2.01E-08 | no  | no  |

<sup>a</sup> GoDMC Database <http://mqtlldb.godmc.org.uk/search?query=cg19693031> (Accessed 25 February 2022)

<sup>b</sup> GTEx Portal <https://gtexportal.org/> (Accessed 25 February 2022)

Online Supplemental Table 3. Variants associated with cg21534330 methylation (meQTLs) at genome-wide significance in the EDC cohort

| CHR | Accession | Gene Symbol | Variant | SNP | BP | A1 | BETA | SE | L95 | U95 | STAT | P | meQTL in | eQTL in |
|-----|-----------|-------------|---------|-----|----|----|------|----|-----|-----|------|---|----------|---------|
|-----|-----------|-------------|---------|-----|----|----|------|----|-----|-----|------|---|----------|---------|

|    | Num         |              | Type                   |             |           |    |          |          |          |          |        |          | GoDMC <sup>a</sup> | GTEEx <sup>b</sup> |
|----|-------------|--------------|------------------------|-------------|-----------|----|----------|----------|----------|----------|--------|----------|--------------------|--------------------|
| 2  | rs72819137  | AFF3         | Intron<br>SNV          | 2:100500167 | 100500167 | T  | -0.04412 | 0.006786 | -0.05742 | -0.03082 | -6.502 | 2.37E-10 | no                 | no                 |
| 7  | rs9655138   | ANKMY2       | Intron<br>SNV          | 7:16649835  | 16649835  | T  | -0.03627 | 0.005292 | -0.04664 | -0.0259  | -6.854 | 2.74E-11 | no                 | no                 |
| 7  | rs71540757  | ANKMY2       | Intron<br>SNV          | 7:16653094  | 16653094  | A  | -0.03652 | 0.005337 | -0.04698 | -0.02606 | -6.843 | 2.93E-11 | no                 | no                 |
| 7  | rs11772957  | ANKMY2       | Intron<br>SNV          | 7:16651317  | 16651317  | C  | -0.03043 | 0.004843 | -0.03992 | -0.02094 | -6.284 | 8.64E-10 | no                 | no                 |
| 7  | rs10282627  | ANKMY2       | Intron<br>SNV          | 7:16652216  | 16652216  | C  | -0.02986 | 0.004795 | -0.03926 | -0.02046 | -6.227 | 1.21E-09 | no                 | no                 |
| 7  | rs2286230   | ANKMY2       | Intron<br>SNV          | 7:16648885  | 16648885  | C  | -0.02998 | 0.004826 | -0.03944 | -0.02053 | -6.214 | 1.31E-09 | no                 | no                 |
| 7  | rs370078    | ATP6V0A4     | Intron<br>SNV          | 7:138432523 | 138432523 | T  | -0.03357 | 0.005696 | -0.04473 | -0.0224  | -5.893 | 8.06E-09 | no                 | no                 |
| 17 | rs16943912  | LOC105371536 | Intron<br>SNV          | 17:10818236 | 10818236  | C  | -0.03255 | 0.005776 | -0.04387 | -0.02123 | -5.636 | 3.30E-08 | no                 | no                 |
| 20 | rs147213238 | n/a          | Indel                  | 20:50664946 | 50664946  | GA | -0.04086 | 0.006068 | -0.05275 | -0.02897 | -6.734 | 5.76E-11 | no                 | no                 |
| 20 | rs73281721  | n/a          | SNV                    | 20:50665214 | 50665214  | T  | -0.04086 | 0.006068 | -0.05275 | -0.02897 | -6.734 | 5.76E-11 | no                 | no                 |
| 20 | rs76950404  | n/a          | SNV                    | 20:50670387 | 50670387  | C  | -0.04026 | 0.006026 | -0.05207 | -0.02845 | -6.682 | 7.97E-11 | no                 | no                 |
| 20 | rs80294592  | n/a          | SNV                    | 20:50681096 | 50681096  | C  | -0.03877 | 0.005938 | -0.0504  | -0.02713 | -6.528 | 2.03E-10 | no                 | no                 |
| 8  | rs113203945 | n/a          | SNV                    | 8:111571815 | 111571815 | A  | -0.02562 | 0.004351 | -0.03415 | -0.01709 | -5.888 | 8.31E-09 | no                 | no                 |
| 1  | rs72716780  | n/a          | SNV                    | 1:88503824  | 88503824  | G  | -0.03534 | 0.006094 | -0.04728 | -0.0234  | -5.799 | 1.36E-08 | no                 | no                 |
| 8  | rs17677264  | TNKS         | 2KB<br>Upstream<br>SNV | 8:9412050   | 9412050   | C  | -0.03582 | 0.006328 | -0.04822 | -0.02342 | -5.661 | 2.88E-08 | no                 | no                 |

<sup>a</sup> GoDMC Database <http://mqtl.db.godmc.org.uk/search?query=cg19693031> (Accessed 25 February 2022)

<sup>b</sup> GTEx Portal <https://gtexportal.org/> (Accessed 25 February 2022)

Online Supplemental Table 4. Association between cg19693031 methylation and baseline clinical characteristics, independent of HbA1c

|  | Individual Models* | Final Model† |
|--|--------------------|--------------|
|--|--------------------|--------------|

|                                           | $\beta$ (standard error) | p-value | $\beta$ (standard error) | p-value |
|-------------------------------------------|--------------------------|---------|--------------------------|---------|
| Total Cholesterol                         | -0.00019 (0.0001)        | 0.052   | NR                       | -       |
| HDLc                                      | -0.00004 (0.0003)        | 0.897   | NO                       | -       |
| Non-HDLc                                  | -0.00019 (0.0001)        | 0.054   | NR                       | -       |
| ln(Triglycerides)                         | -0.0209 (0.0072)         | 0.004   | NR                       | -       |
| Systolic BP                               | -0.00004 (0.0002)        | 0.869   | NO                       | -       |
| Diastolic BP                              | -0.00040 (0.0004)        | 0.272   | NO                       | -       |
| Pulse rate                                | -0.00093 (0.0004)        | 0.009   | -0.00093 (0.0004)        | 0.009   |
| BMI                                       | 0.00033 (0.0012)         | 0.776   | NO                       | -       |
| Insulin Dose                              | -0.01128 (0.0164)        | 0.491   | NO                       | -       |
| Multiple daily injections or Insulin Pump | 0.01438 (0.0110)         | 0.190   | NR                       | -       |
| Hypoglycemia Requiring Assistance         | 0.00994 (0.0077)         | 0.198   | NR                       | -       |
| Any History of Diabetic Ketoacidosis      | -0.02409 (0.0156)        | 0.124   | NR                       | -       |
| ln(ACR)                                   | -0.00362 (0.0019)        | 0.059   | NR                       | -       |
| eGFR                                      | -0.00017 (0.0001)        | 0.187   | NR                       | -       |

\*Data are the change in methylation associated with a 1-unit increment in each clinical variable modeled separately, adjusting for HbA1c, type 1 diabetes duration, sex, pack years of smoking, and estimated cell type composition.

†All clinical variables with  $p < 0.2$  in the individual models were offered for final model selection using backward selection. NR=offered but not retained in the final model ( $p > 0.1$ ), NO=not offered, individual model  $p > 0.20$ .

Online Supplemental Table 5. Associations between 28-Year longitudinal clinical risk factors and cg19693031 methylation, independent of HbA1c



|                   | Minimally adjusted $\beta$ per 5% cg19693031 methylation* (standard error) | Minimally adjusted p-value* | Fully adjusted $\beta$ per 5% cg19693031 methylation* (standard error) | Fully adjusted p-value† |
|-------------------|----------------------------------------------------------------------------|-----------------------------|------------------------------------------------------------------------|-------------------------|
| Total Cholesterol | <b>-2.37 (0.92)</b>                                                        | <b>0.010</b>                | -0.68 (0.93)                                                           | 0.468                   |
| HDLc              | -0.06 (0.34)                                                               | 0.858                       | n/a                                                                    | n/a                     |
| Non-HDLc          | <b>-2.65 (0.91)</b>                                                        | <b>0.004</b>                | -1.01 (0.92)                                                           | 0.272                   |
| ln(Triglycerides) | <b>-0.06 (0.01)</b>                                                        | <b>&lt;0.0001</b>           | <b>-0.05 (0.01)</b>                                                    | <b>&lt;0.0001</b>       |
| Systolic BP       | -0.55 (0.74)                                                               | 0.452                       | n/a                                                                    | n/a                     |
| Diastolic BP      | -0.29 (0.23)                                                               | 0.213                       | -0.27 (0.70)                                                           | 0.698                   |
| Pulse rate        | <b>-0.98 (0.22)</b>                                                        | <b>&lt;0.0001</b>           | <b>-0.84 (0.22)</b>                                                    | <b>&lt;0.0001</b>       |
| BMI               | -0.04 (0.10)                                                               | 0.663                       | n/a                                                                    | n/a                     |
| Insulin Dose      | -0.01 (0.01)                                                               | 0.073                       | n/a                                                                    | n/a                     |
| ln(ACR)           | <b>-0.24 (0.05)</b>                                                        | <b>&lt;0.0001</b>           | <b>-0.20 (0.05)</b>                                                    | <b>&lt;0.0001</b>       |
| eGFR              | 0.89 (0.73)                                                                | 0.221                       | n/a                                                                    | n/a                     |

Bold text indicates p<0.05

\*Minimally adjusted for HbA1c, type 1 diabetes duration, sex, pack years of smoking, and cell type composition

†For factors significant at p<0.05 after minimal adjustment, fully adjusted for HbA1c, type 1 diabetes duration, sex, pack years of smoking, and cell type composition and all other factors with p-value<0.05 (total cholesterol model not adjusted for non-HDLc and vice versa)
